# Supplementary material for: Carbon nitride polymer sensitized TiO2 nanotube arrays with enhanced visible light photoelectrochemical and photocatalytic performance
Source: Royal Society of Chemistry journal article supplement (doi:10.1039/c1cc13862f), 2011-01-01
Supplement: c1cc13862f.pdf [file c1cc13862f.pdf]

## Supporting Information

### **Carbon nitride polymer sensitized TiO<sub>2</sub> nanotube arrays with enhanced visible light photoelectrochemical and photocatalytic performance**

*Xiaosong Zhou<sup>†</sup>, Feng Peng<sup>\*,†</sup>, Hongjuan Wang<sup>†</sup>, Hao Yu<sup>†</sup>, Yueping Fang<sup>\*,‡</sup>*

<sup>†</sup>The School of Chemistry and Chemical Engineering, South China University of Technology,

Guangzhou 510640, China

<sup>‡</sup>The Institute of Biomaterial, College of Science, South China Agricultural University,

Guangzhou, 510642, China

\*Corresponding author, Email address: [cefpeng@scut.edu.cn](mailto:cefpeng@scut.edu.cn) (Feng Peng), Fax: +86 20 87114916.

**Photoelectrodes Fabrication.** The highly ordered TiO<sub>2</sub> nanotube array film was prepared by anodic oxidation in a NH<sub>4</sub>F organic electrolyte, similarly to that described by Paulose et al.<sup>1</sup> First, metal Ti foil was cleaned with ethanol and de-ionized water prior to anodization. Then the Ti foil was immersed in a mixed ethylene glycol solution of 0.05% NH<sub>4</sub>F, and subjected to a constant 60 V anodic potential for 12 h at room temperature in a two-electrode electrochemical cell connected to a DC power supply. After anodic oxidation, the sample was rinsed with de-ionized water, and dried in a N<sub>2</sub> stream. The resulting amorphous titania nanotube array film was annealed at 450 °C for 4h with heating and cooling rates of 10 °C/min in an O<sub>2</sub> atmosphere to crystallize the tube walls and improve its stoichiometry.

Carbon nitride polymer was deposited into the crystallized TiO<sub>2</sub> nanotubes by electrodeposition. The preparation of method is similar to that reported in literature.<sup>2</sup> The experimental setup used to synthesize the composite film is like that described in literature.<sup>3,4</sup> Typically, the crystallized TiO<sub>2</sub> nanotube array film was used as positive electrode and iron silk was used as negative electrode. The interelectrode separation in all the cases was 2 mm. Analytically pure methanol (≥99.5%) and acetonitrile mixtures were used as solvent and 0.1 M dicyandiamide was used as electrolyte. The typical sample was deposited under an applied potential of 120 V at room temperature.

**The amounts of CN polymer deposited.** It is very difficult to measure the amount of CN polymer deposited. Herein, the amount of C-N polymer deposited was calculated.

$$\text{Charge: } Q=I \cdot t \quad (1-1)$$

$$\text{Number of electrons: } N=Q/e= It / e \quad (1-2)$$

$$n=N/N_0 \quad (1-3)$$

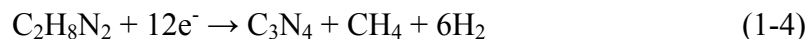

Using formula (1-1), (1-2), (1-3) and equation (1-4), we can calculate the amount of C-N polymer with different deposited time according to the below formula:

$$m_{(C_3N_4)}=M_{(C_3N_4)}It/12eN_0 \quad (1-5)$$

Here,  $I=0.001$  A;  $e=1.6 \times 10^{-19}$  C;  $N_0=6.02 \times 10^{23}$  mol<sup>-1</sup>;  $M_{(C_3N_4)}=92.06$  g/mol

**Table S1** The amount of C-N polymer deposited with different deposited time

|                                                                          |       |       |       |       |
|--------------------------------------------------------------------------|-------|-------|-------|-------|
| Deposited time, t (min)                                                  | 2.5   | 5.0   | 10.0  | 30.0  |
| Amount of C <sub>3</sub> N <sub>4</sub> , m (mg)                         | 0.012 | 0.024 | 0.048 | 0.143 |
| Unit amount of C <sub>3</sub> N <sub>4</sub> , m/S* (mg/m <sup>2</sup> ) | 24    | 48    | 96    | 287   |

\*TNT array electrode area:  $2.5 \times 10^{-2}$  m  $\times$   $2.0 \times 10^{-2}$  m =  $5.0 \times 10^{-4}$  m<sup>2</sup>

**Photocatalytic activity test.** The photocatalytic activity was measured in a XPAII reactor (Nanjing Xujiang Machineelectronic Plant). The sample film (8×20 mm) was immersed in 10-ml quartz test tube containing 4 ml Acid Orange II (OII) (10 mg/ L) in the dark for 1 h to achieve adsorption equilibrium before irradiation. After that, a 1000 W Xe lamp (the UV light was cut off by 2.0 M sodium nitrite) was used as the visible light source to conduct the photocatalytic experiment at 40°. The remaining dye concentration in the reaction solution was determined using the U3010 spectrophotometer. The whole decomposing process was conducted in air without sparging oxygen gas.

**X-ray photoelectron spectroscopy(XPS).** The chemical bonds of the sample were detected by the XPS analysis, as shown in [Figure S1](#). The C 1s and N 1s spectra were deconvoluted into various peaks ([Figure S1a and S1b](#)). The C 1s peak at 284.6 eV is assigned

to the C–C bond in the turbostratic CN structure,<sup>5</sup> and the peak at 286.3 eV is attributed to the  $sp^2$  C atoms bonded to N inside the aromatic structure. We assign the peak at 288.4 eV to the  $sp^3$  C–N bond of the  $sp^3$  bonded composition.<sup>5,6</sup> The N 1s peak is comprised of two components centered at 398.7 eV and 400.1 eV, which are identified as the C-N-C groups<sup>5</sup> and the nitrogen surrounded by an amorphous N-(C)<sub>3</sub> network,<sup>7</sup> respectively. The result shows that the turbostratic CN structure is nearly to the mesoporous carbon nitride reported by Vinu's<sup>8</sup> and the one in bulk by Gao's group<sup>6</sup>, who used the same kind of carbon nitride precursor. The O 1s core level peak at 530.0 eV comes from Ti-O-Ti linkages in TiO<sub>2</sub> (Figure S1c), which is consistent with that of the reports.<sup>9,10</sup> The pair of peaks of Ti 2p<sub>3/2</sub> and 2p<sub>1/2</sub> appeared at 458.7 and 464.4 eV, respectively, which can be assigned to Ti<sup>4+</sup> 2p peaks of TiO<sub>2</sub><sup>9,10</sup> (Figure S1d).

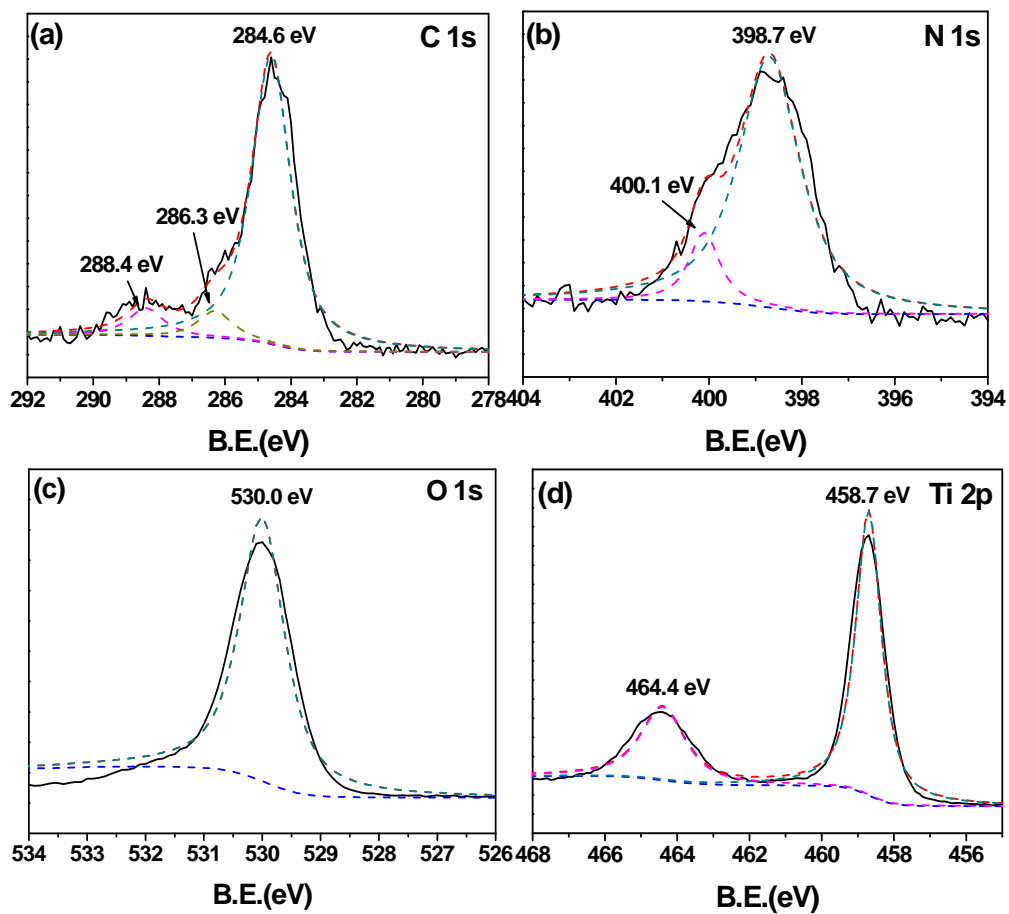

**Figure S1.** XPS spectra of CN deposited TiO<sub>2</sub> nanotube array: (a) C 1s; (b) N 1s; (c) O 1s; (d) Ti 2p.

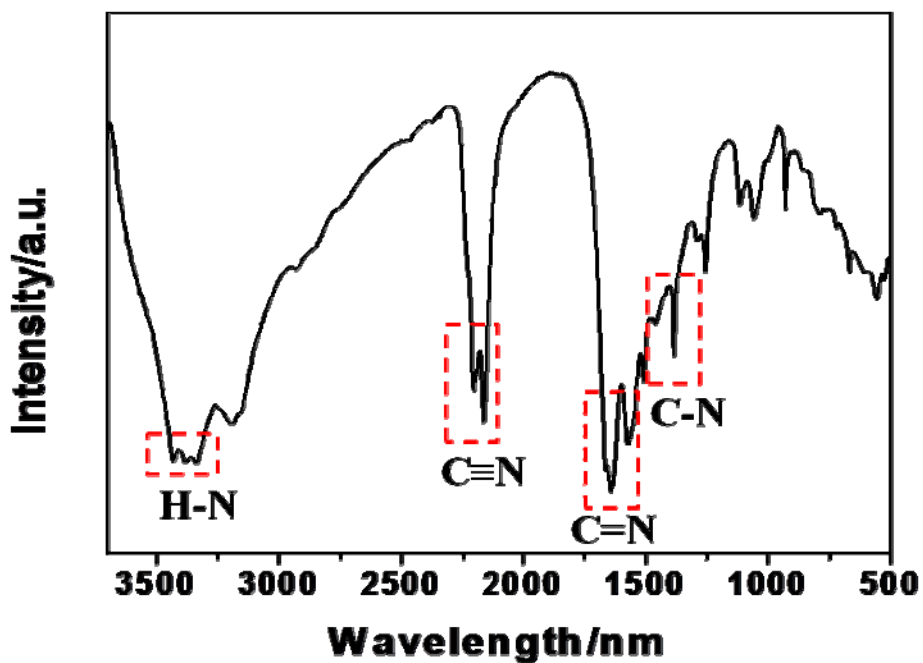

**Fig. S2.** The FT-IR of the CN deposited TiO<sub>2</sub> nanotube array (deposition time is five minutes).

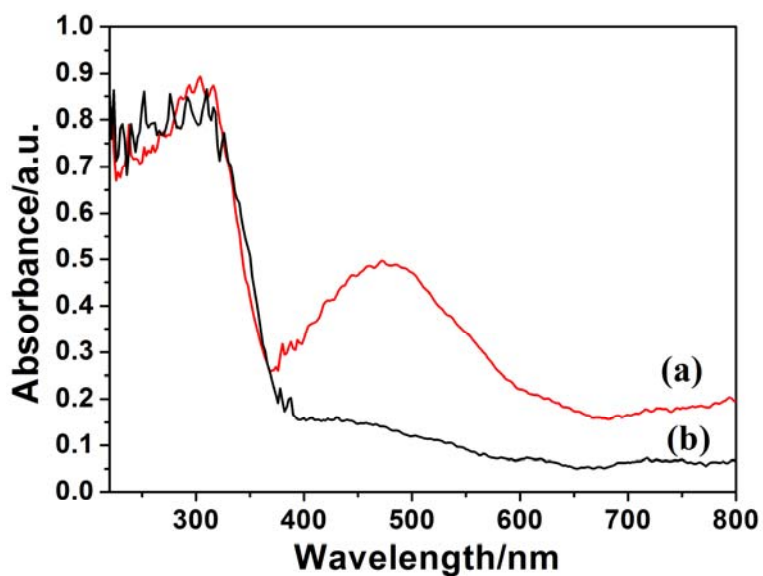

**Figure S3** DRS spectrum of the CN polymer / TNT array (a) and the plain TNT array (b) (deposition time is five minutes).

### Supplementary References.

1. M. Paulose, K. Shankar, S. Yoriya, H.E. Prakasam, O.K. Varghese, G.K. Mor, T.A. Latempa, A. Fitzgerald, C.A. Grimes, *J. Phys. Chem. B*, 2006, **110**, 16179.
2. S.F. Wang, W.T. Huang, R.S. Liang, Q.H. Gong, *Phys. Rev. B*, 2001, **63**, 153408
3. T.W. Scharf, R.D. Ott, D. Yang, J.A. Barnard, *J. Appl. Phys.*, 1999, **85**, 3142.
4. K. Sreejith, J. Nuwad, C.G.S. Pillai, *Applied Surface Science*, 2005, **252**, 321.
5. Q. Lv, C.B. Cao, C. Li, J.T. Zhang, H.S. Zhu, X. Kong, X.F. Duan, *J. Mater. Chem.*, 2003, **13**, 1241
6. Y. Qiu, L. Gao, *Chem. Commun.*, 2003, **18**, 2378
7. Q.X. Guo, Y. Xie, X. Wang, S. Zhang, T. Hou, S. Lv, *Chem. Commun.*, 2004, **1**, 26
8. A. Vinu, K. Ariga, T. Mori, T. Nakanishi, S. Hishita, D. Golberg, Y. Bando, *Adv. Mater.*, 2005, **17**, 1648
9. M. Sathish, B. Viswanathan, R.P. Viswanath, C.S. Gopinath, *Chem. Mater.*, 2005, **17**, 6349
10. X.B. Chen, C. Burda, *J. Phys. Chem.B*, 2004, **108**, 15446
